# Supplementary material for: Understanding viscosity reduction of a long-tail sulfobetaine viscoelastic surfactant by organic compounds
Source: Royal Society of Chemistry journal article supplement (doi:10.1039/c7ra12538k), 2018-01-01
Supplement: c7ra12538k1.pdf [file c7ra12538k1.pdf]

# Understanding viscosity reduction of a long-tail sulfobetaine viscoelastic surfactant by organic compounds

*Lionel Talley Fogang<sup>1</sup>, Abdullah S. Sultan<sup>1,2\*</sup>, Muhammad Shahzad Kamal<sup>2</sup>*

<sup>1</sup>Department of Petroleum Engineering, King Fahd University of Petroleum & Minerals, 31261

Dhahran, Saudi Arabia

<sup>2</sup>Center for Integrative Petroleum Research, King Fahd University of Petroleum & Minerals,

31261 Dhahran, Saudi Arabia

**\*Corresponding Author:** Abdullah S. Sultan

**Email:**

sultanas@kfupm.edu.sa

### Supporting Information for Publication

**Table S 1.** Estimated values of crossover frequency and relaxation time of the pure surfactant solution

| Temperature (°C) | $\eta_0$ (Pa.s) | $G_0$ (Pa) | $\omega_c$ (rad/s)    | $\tau_R$ (s) | $\xi$ (nm) |
|------------------|-----------------|------------|-----------------------|--------------|------------|
| 30               | 186.09          | 4.59       | $2.47 \times 10^{-2}$ | 40.5         | 97.0021    |
| 60               | 138.07          | 4.05       | $2.93 \times 10^{-2}$ | 34.1         | 104.375    |

**Table S 2.** Estimated differences in zero-shear viscosities between the surfactant solutions with the oils and the pure surfactant solutions at test temperatures

| Concentration (wt %) | n-decane           |                    | Crude oil |                    | EVOO |                    | Octa-decane        |
|----------------------|--------------------|--------------------|-----------|--------------------|------|--------------------|--------------------|
|                      | 30°C               | 60°C               | 30°C      | 60°C               | 30°C | 60°C               | 60°C               |
| 0.9                  | $6.72 \times 10^2$ | $5.50 \times 10^4$ | 1.43      | $2.08 \times 10^1$ | 1.17 | $9.65 \times 10^1$ | $1.39 \times 10^1$ |
| 2                    | $1.58 \times 10^5$ | $2.06 \times 10^5$ | 2.12      | $5.62 \times 10^3$ | 2.33 | $3.33 \times 10^3$ | 2.26               |
| 3                    | $1.63 \times 10^5$ | $2.05 \times 10^5$ | 2.62      | $1.92 \times 10^4$ | 9.57 | $6.59 \times 10^3$ | 8.13               |

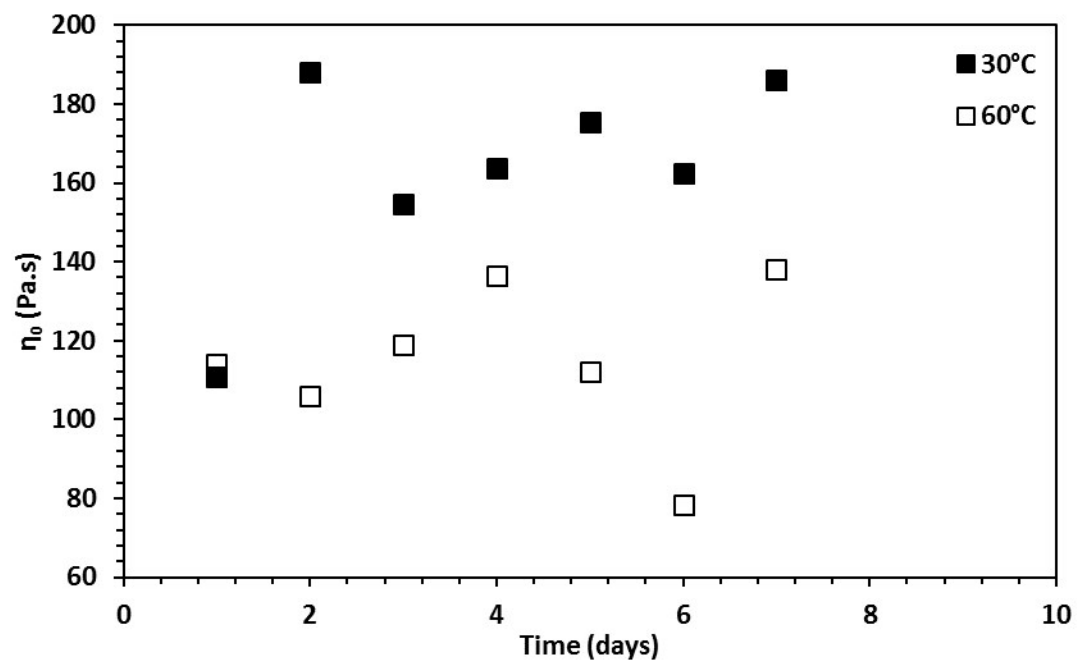

**Figure S 1.** Zero-shear viscosity of surfactant solution with time

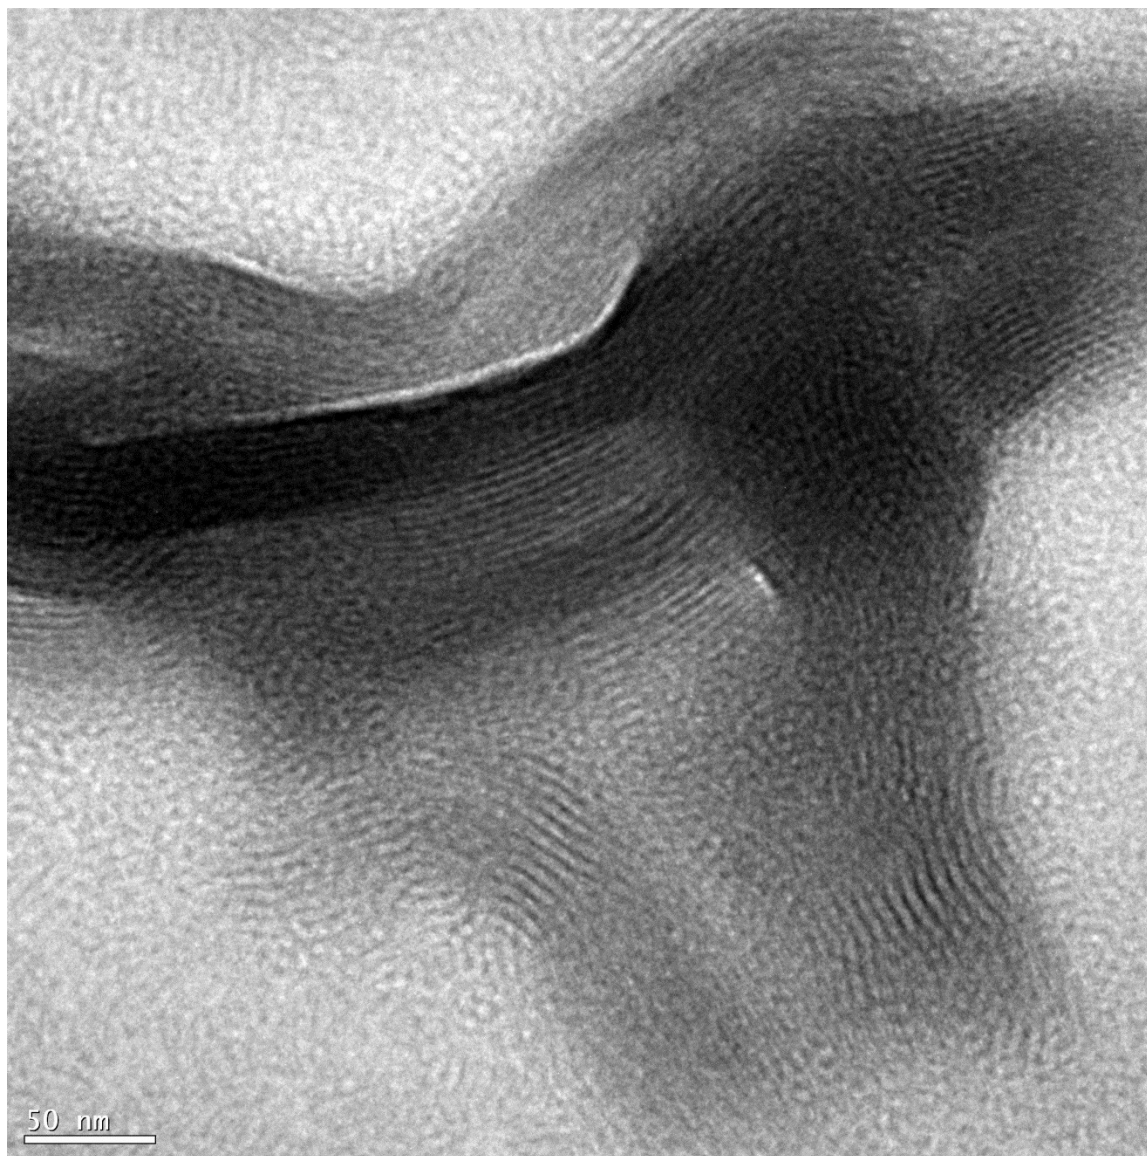

**Figure S 2.** Cryo-TEM image of 3.96 wt % surfactant solution at 30°C diluted in ethyl acetate.

The black curves represent the edges of the micelles

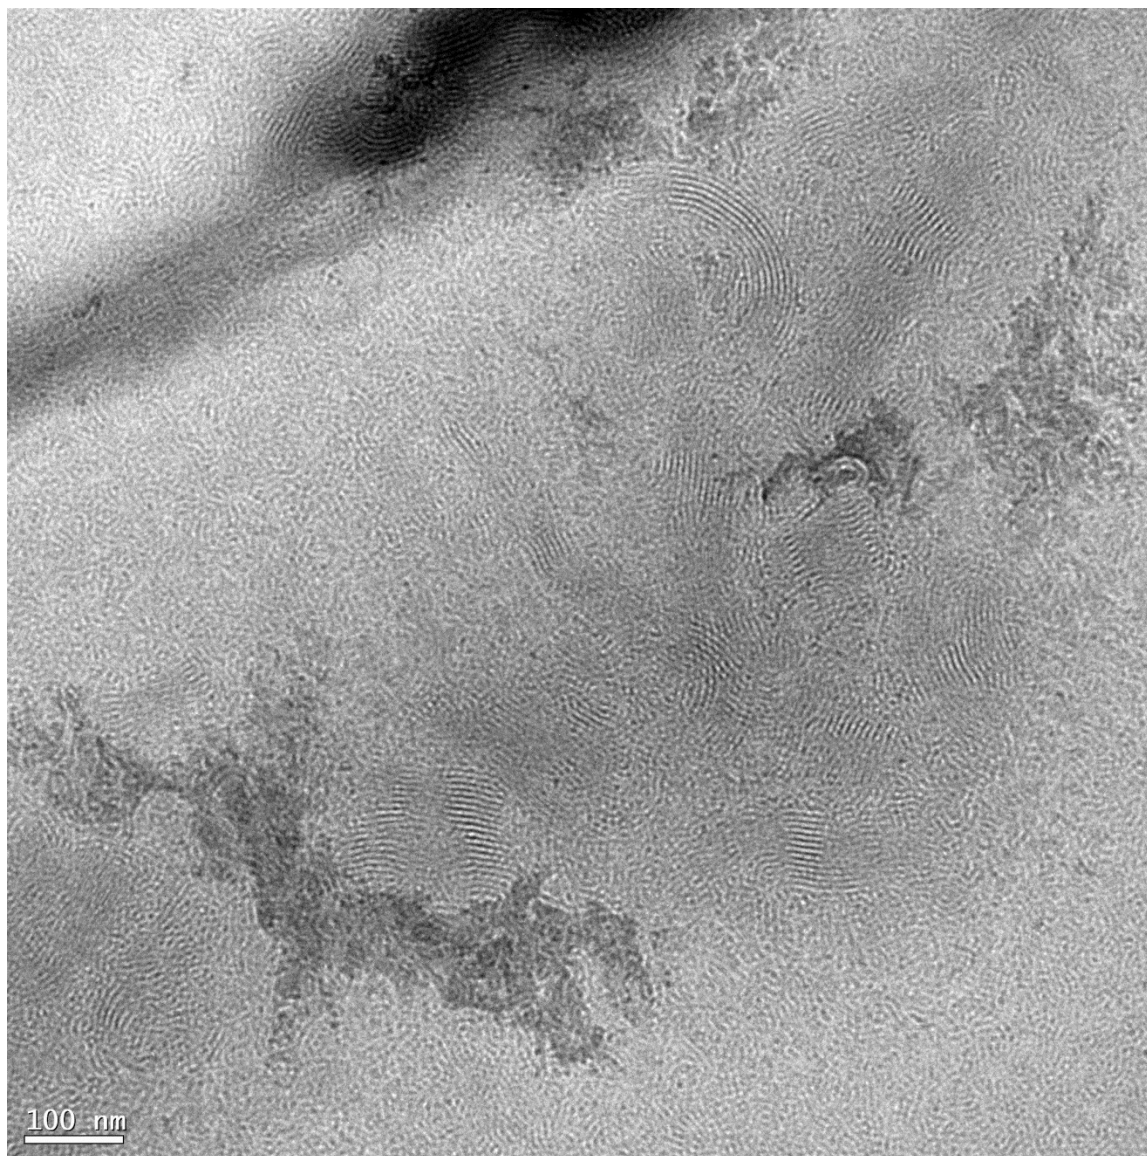

**Figure S 3.** Cryo-TEM image of 3.96 wt % surfactant solution at 30°C diluted in ethyl acetate.

The black curves represent the edges of the micelles

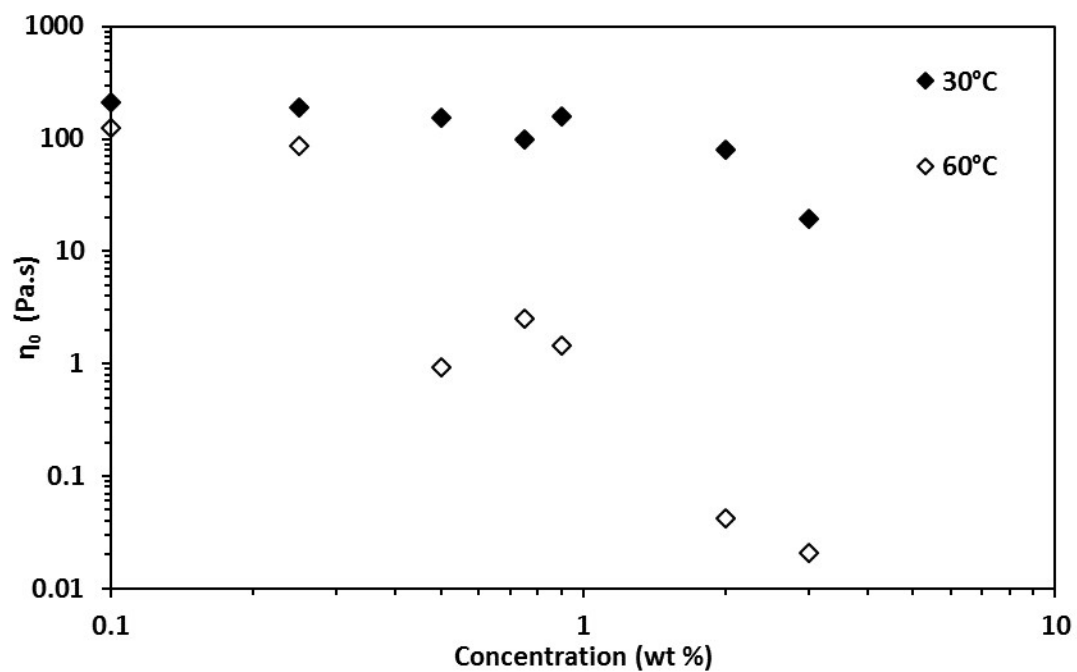

**Figure S 4.** Estimated zero-shear viscosity of 3.96 wt % surfactant solution with different EVOO concentrations

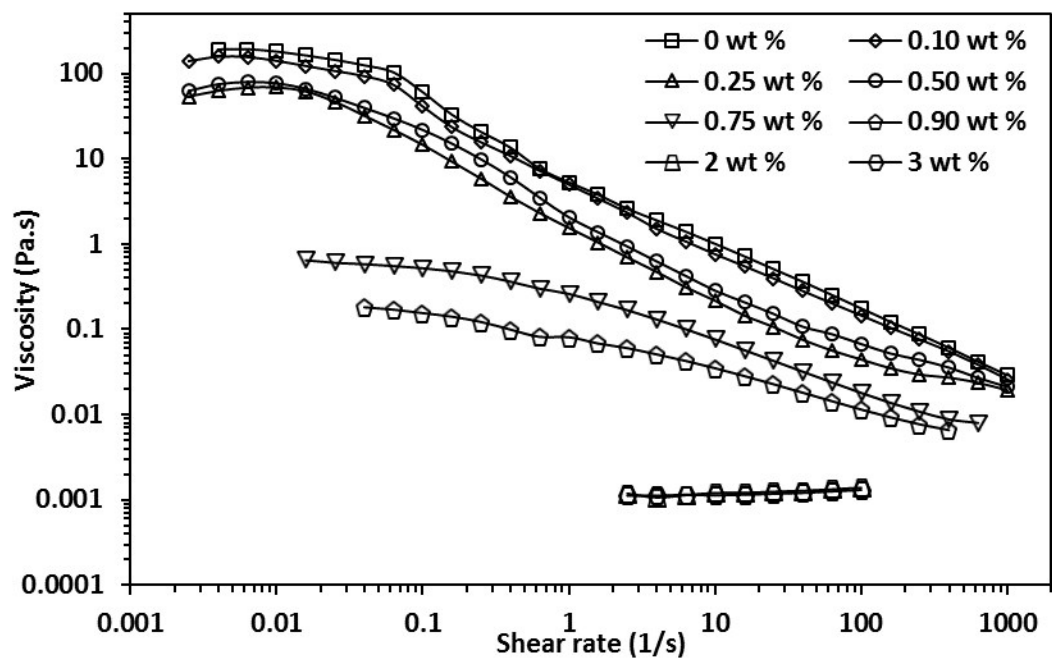

**Figure S 5.** Viscosity vs shear rate of 3.96 wt % surfactant solution with different concentrations of n-decane at 30°C

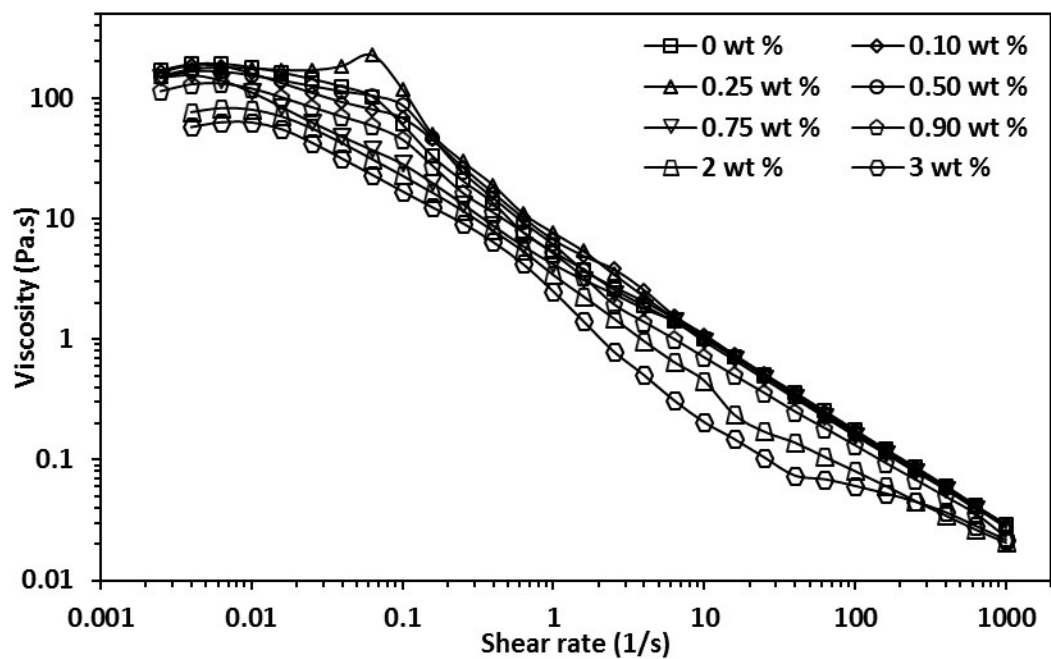

**Figure S 6.** Viscosity vs shear rate of 3.96 wt % surfactant solution with different concentrations of crude oil at 30°C

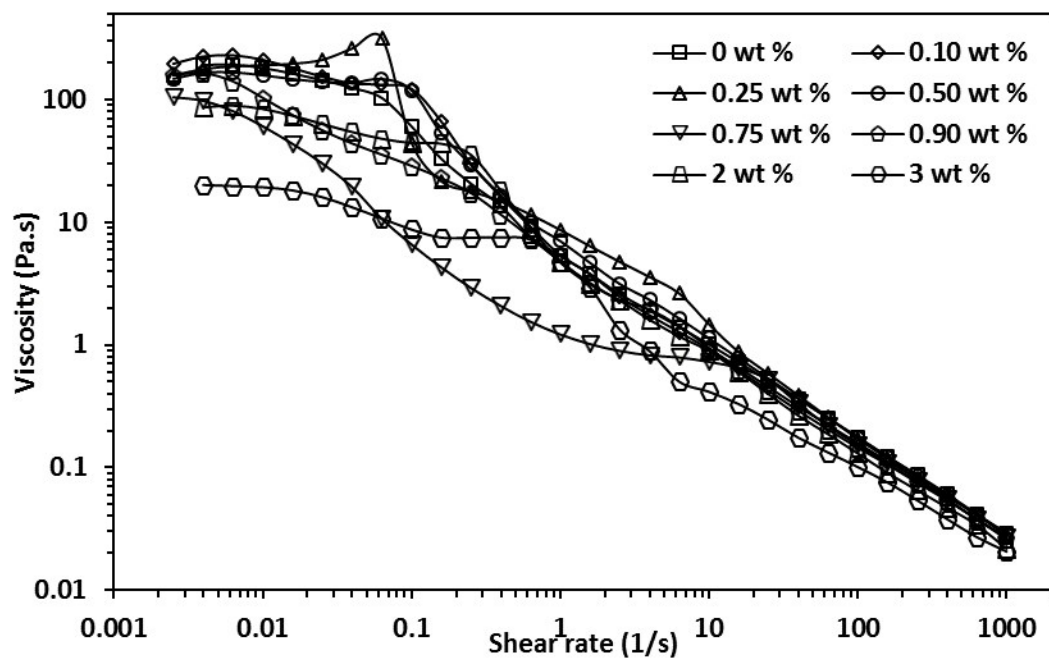

**Figure S 7.** Viscosity vs shear rate of 3.96 wt % surfactant solution with different concentrations of EVOO at 30°C

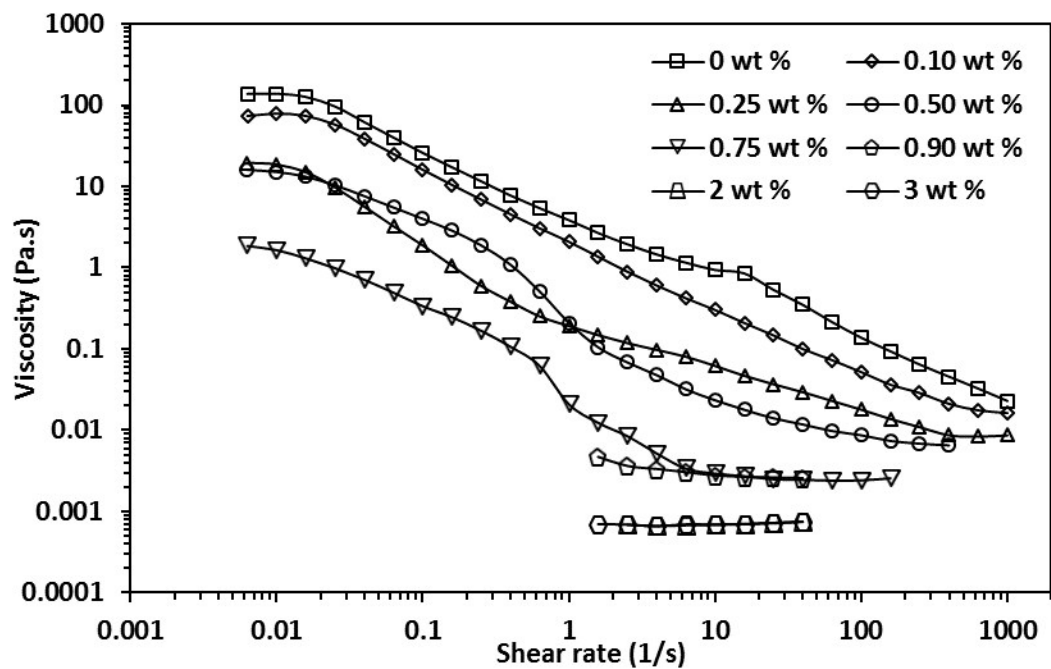

**Figure S 8.** Viscosity vs shear rate of 3.96 wt % surfactant solution with different concentrations of n-decane at 60°C

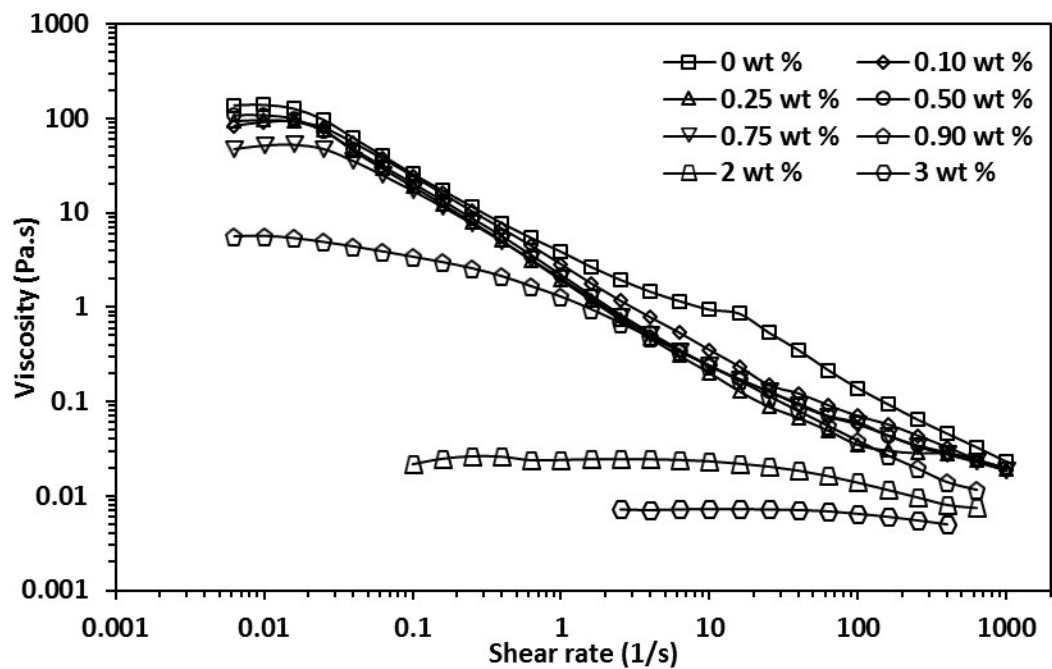

**Figure S 9.** Viscosity vs shear rate of 3.96 wt % surfactant solution with different concentrations of crude oil at 60°C

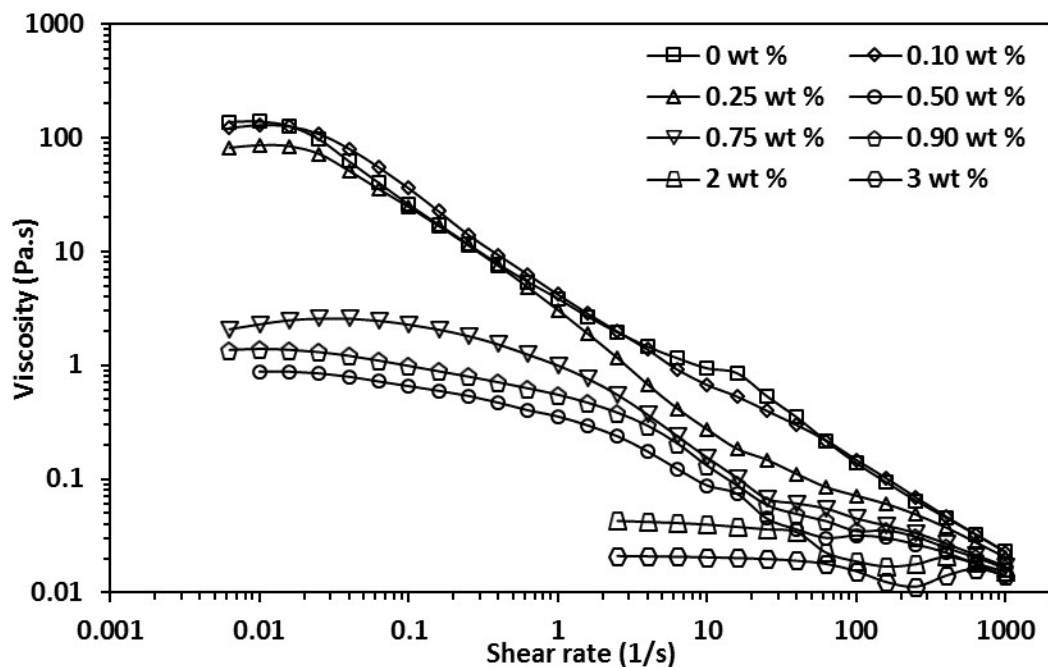

**Figure S 10.** Viscosity vs shear rate of 3.96 wt % surfactant solution with different concentrations of EVOO at 60°C

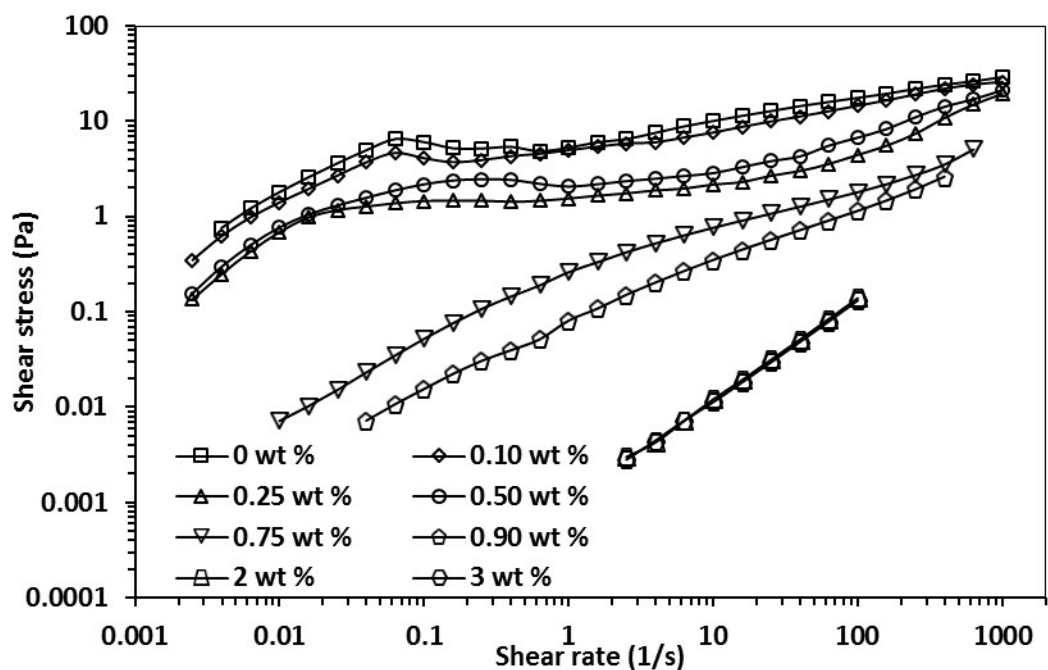

**Figure S 11.** Shear stress vs shear rate of 3.96 wt % surfactant solution with different concentrations of n-decane at 30°C

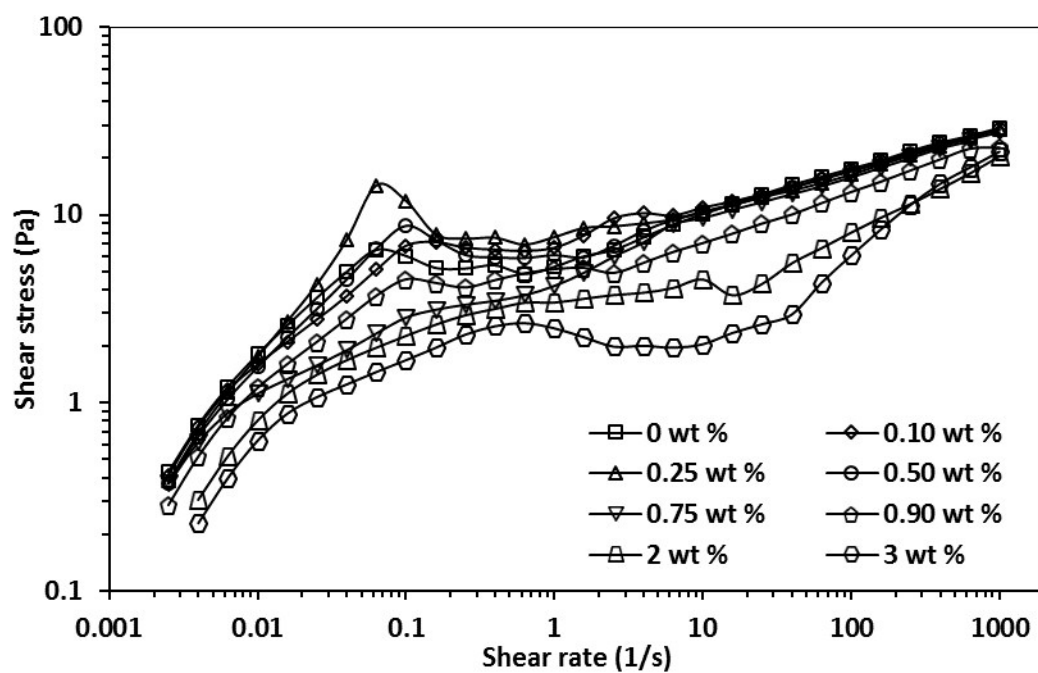

**Figure S 12.** Shear stress vs shear rate of 3.96 wt % surfactant solution with different concentrations of crude oil at 30°C

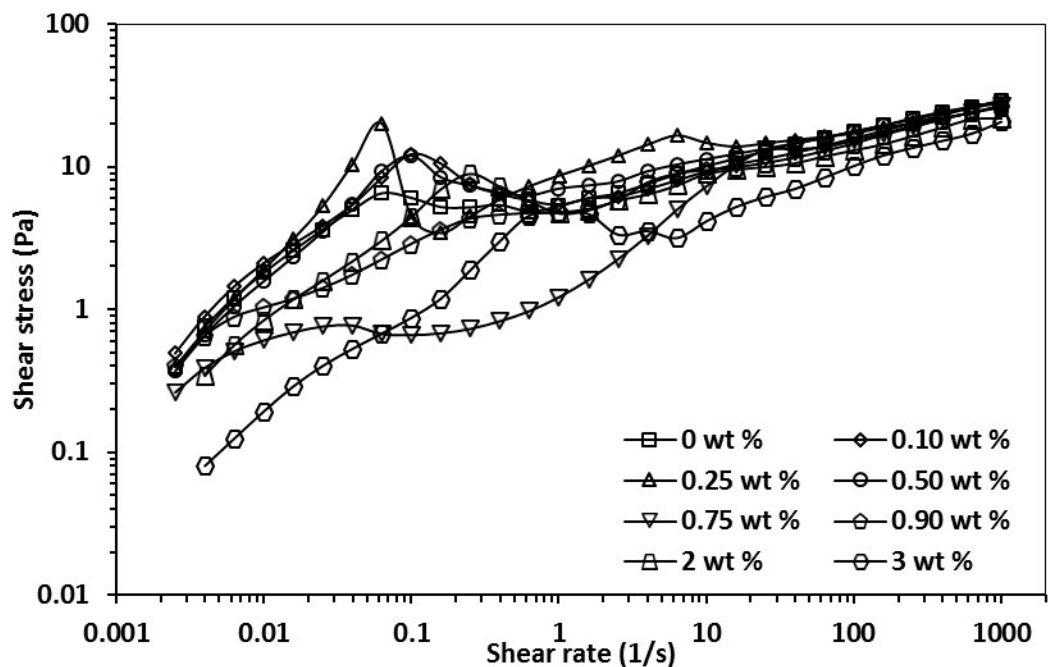

**Figure S 13.** Shear stress vs shear rate of 3.96 wt % surfactant solution with different concentrations of EVOO at 30°C

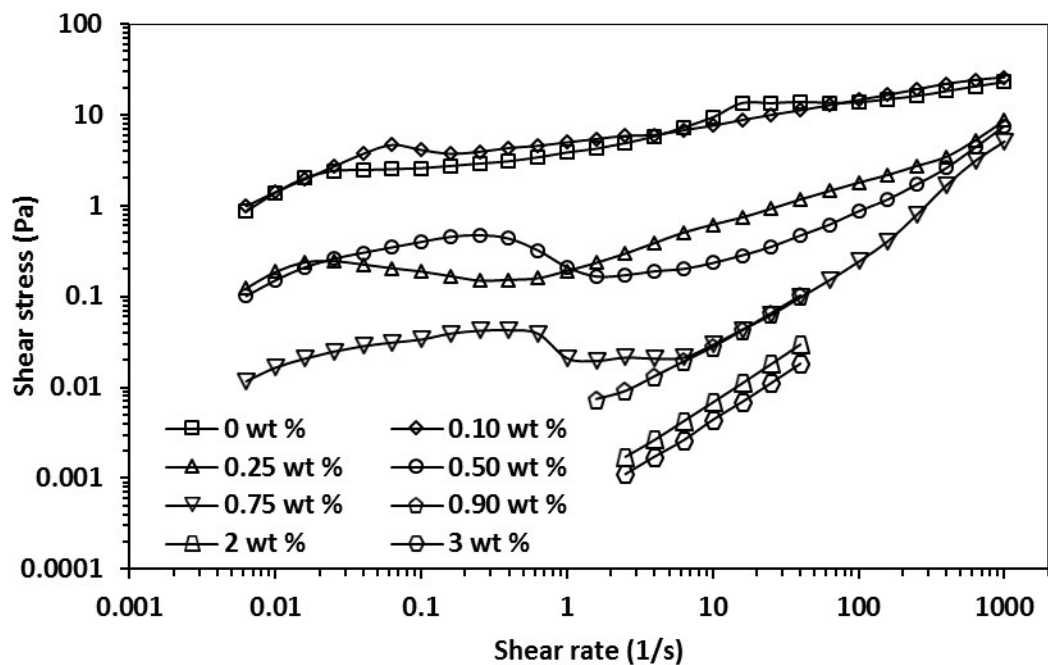

**Figure S 14.** Shear stress vs shear rate of 3.96 wt % surfactant solution with different concentrations of n-decane at 60°C

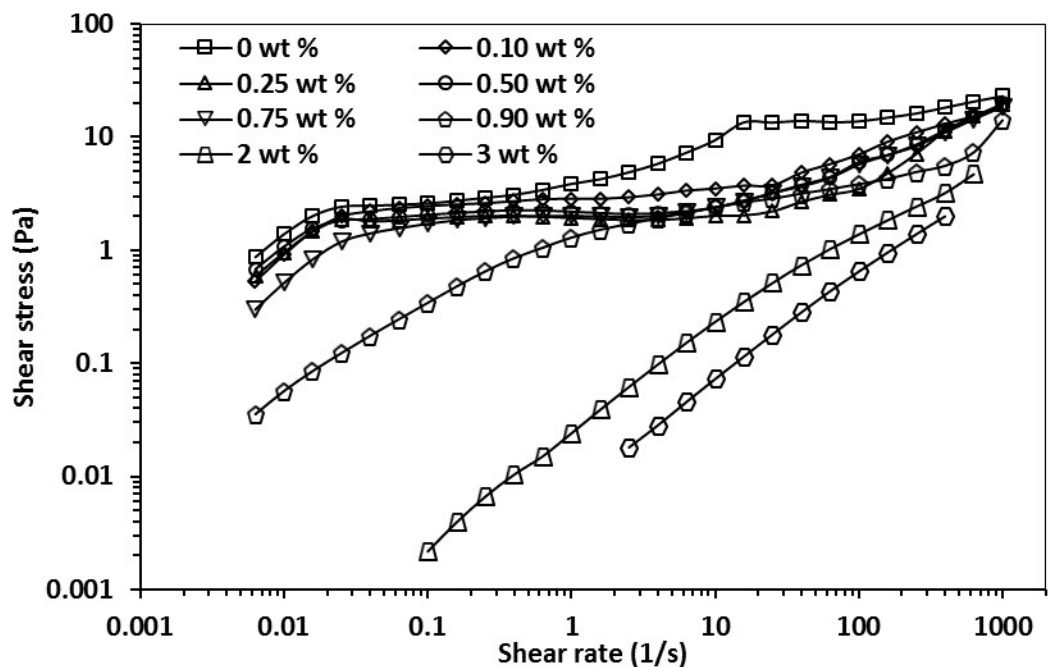

**Figure S 15.** Shear stress vs shear rate of 3.96 wt % surfactant solution with different concentrations of crude oil at 60°C

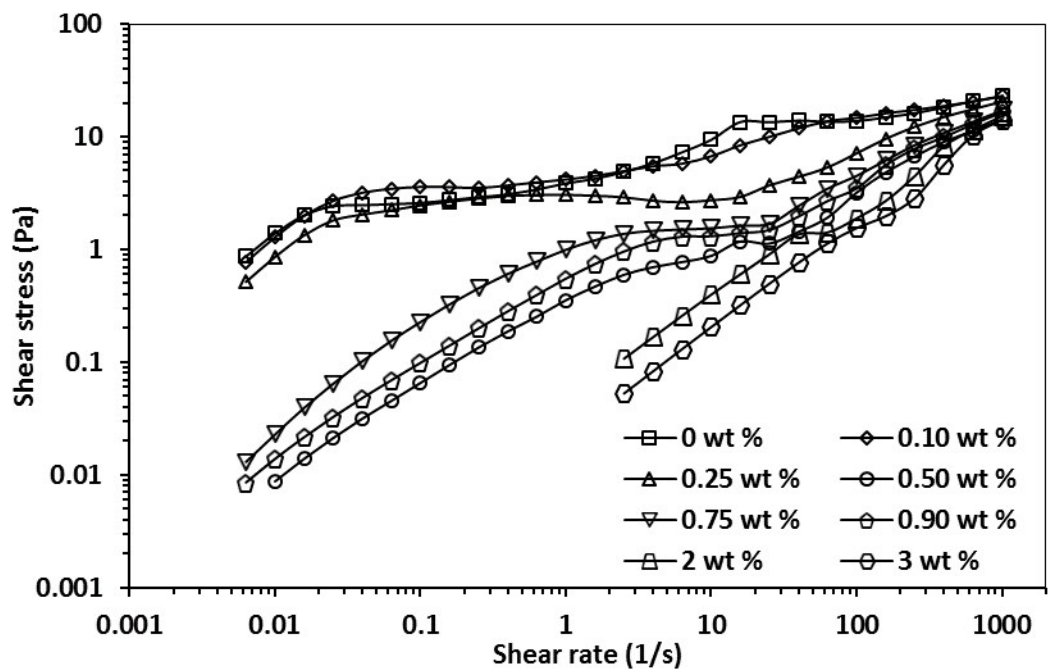

**Figure S 16.** Shear stress vs shear rate of 3.96 wt % surfactant solution with different concentrations of EVOO at 60°C

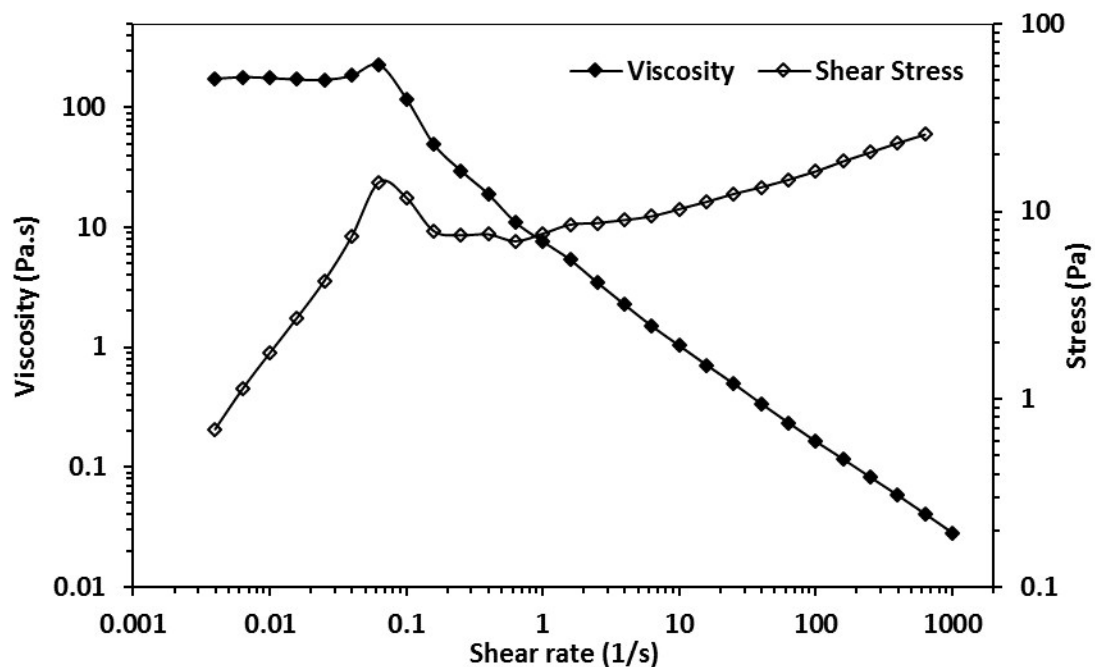

**Figure S 17.** Viscosity and stress vs shear rate of 3.96 wt % surfactant solution with 0.25 wt% crude oil at 30°C.

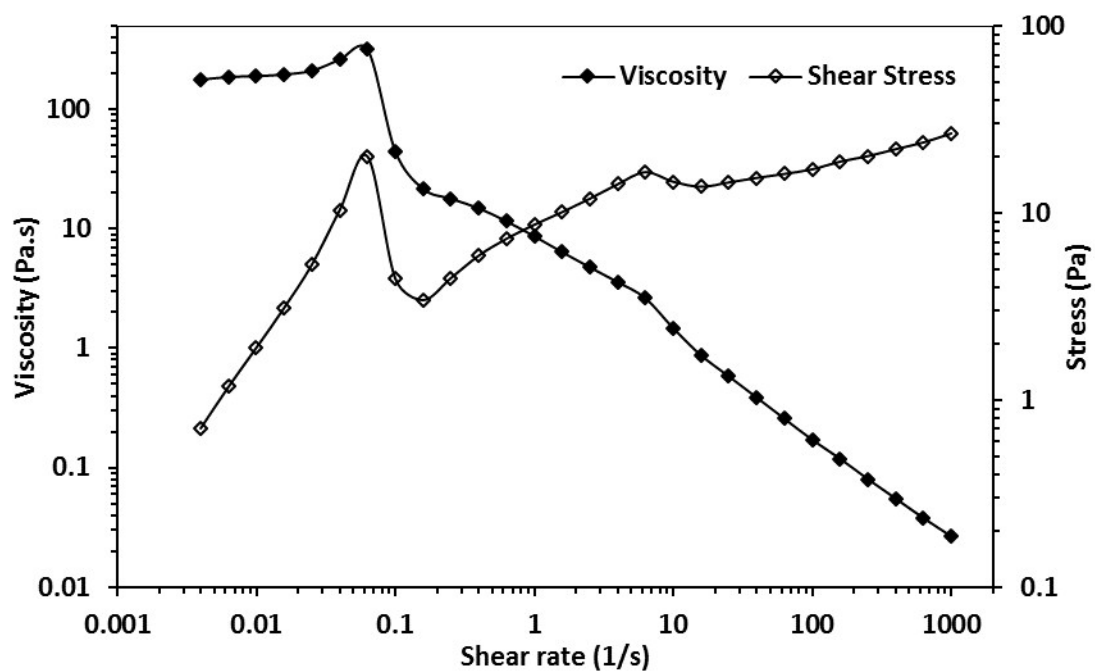

**Figure S 18.** Viscosity and stress vs shear rate of 3.96 wt % surfactant solution with 0.25 wt% EVOO at 30°C

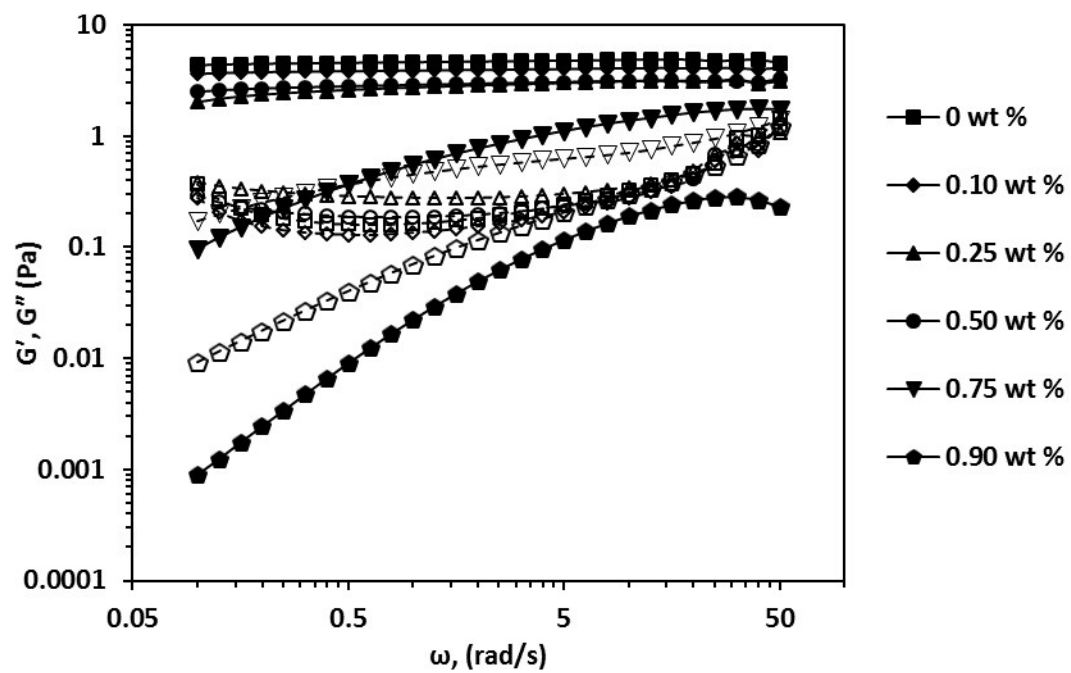

**Figure S 19.** Storage modulus (filled symbols) and loss modulus (open symbols) of 3.96 wt % surfactant solution with different concentrations of n-decane at 30°C

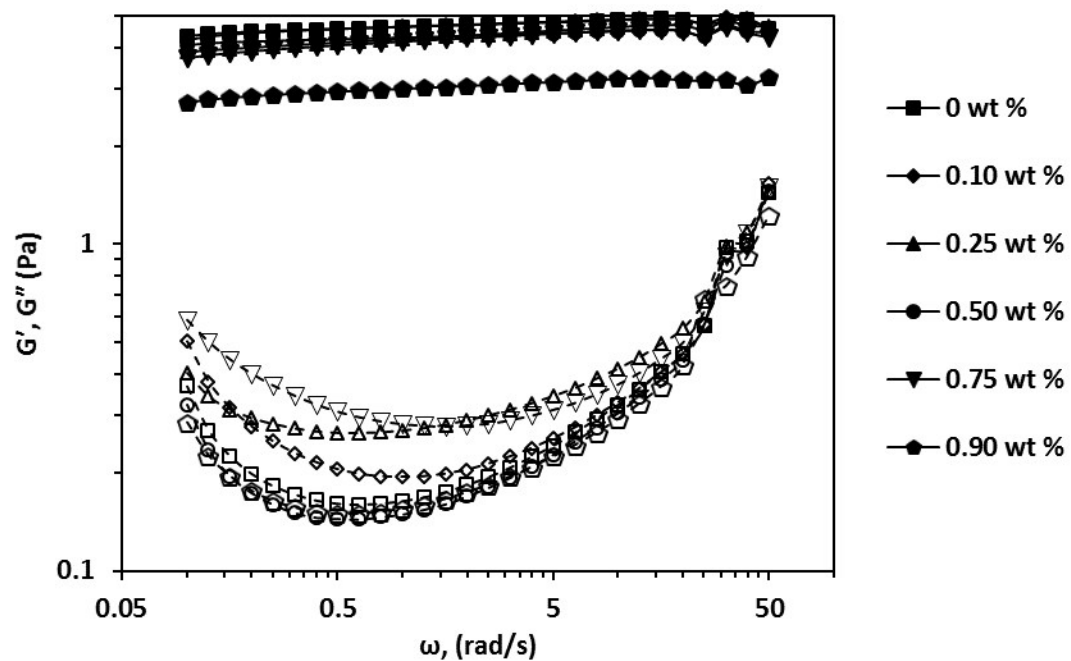

**Figure S 20.** Storage modulus (filled symbols) and loss modulus (open symbols) of 3.96 wt % surfactant solution with different concentrations of crude oil at 30°C

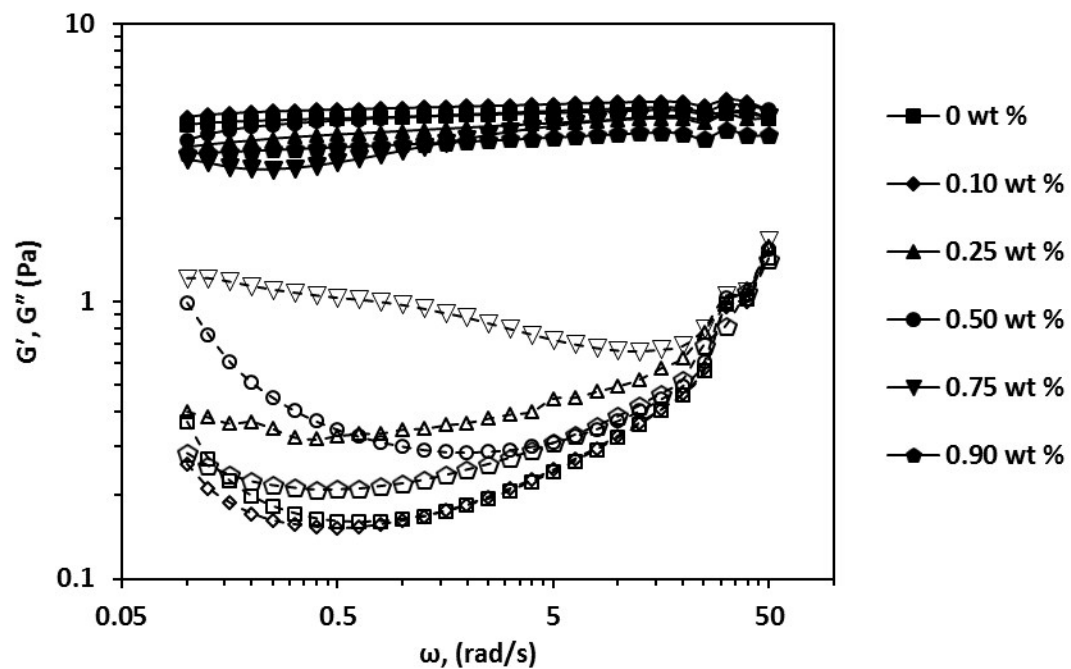

**Figure S 21.** Storage modulus (filled symbols) and loss modulus (open symbols) of 3.96 wt % surfactant solution with different concentrations of EVOO at 30°C

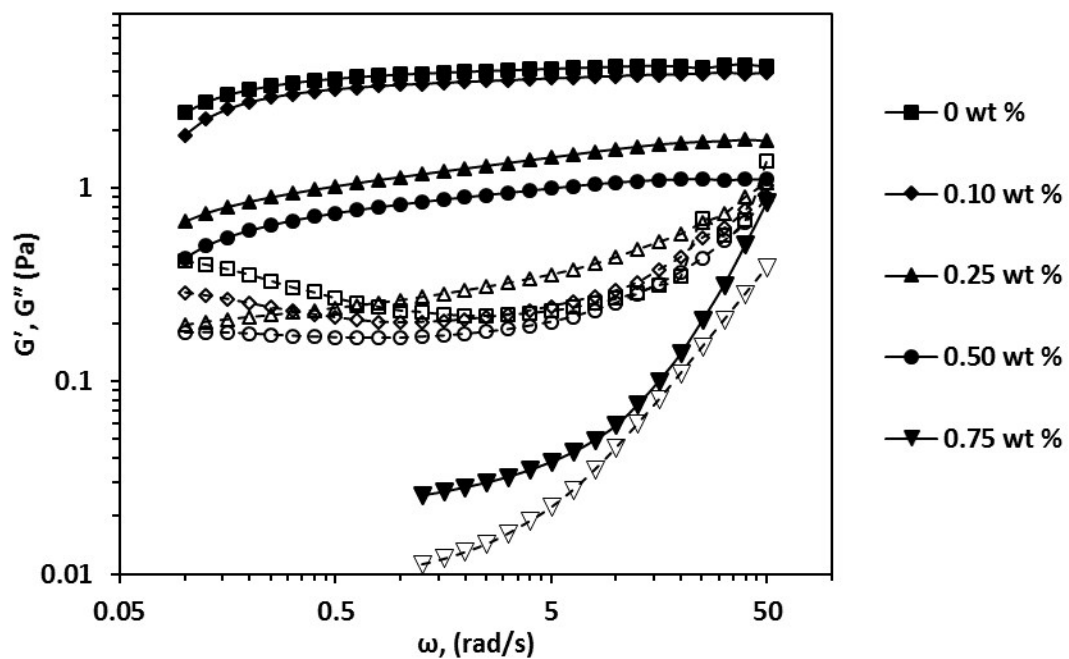

**Figure S 22.** Storage modulus (filled symbols) and loss modulus (open symbols) of 3.96 wt % surfactant solution with different concentrations of n-decane at 60°C

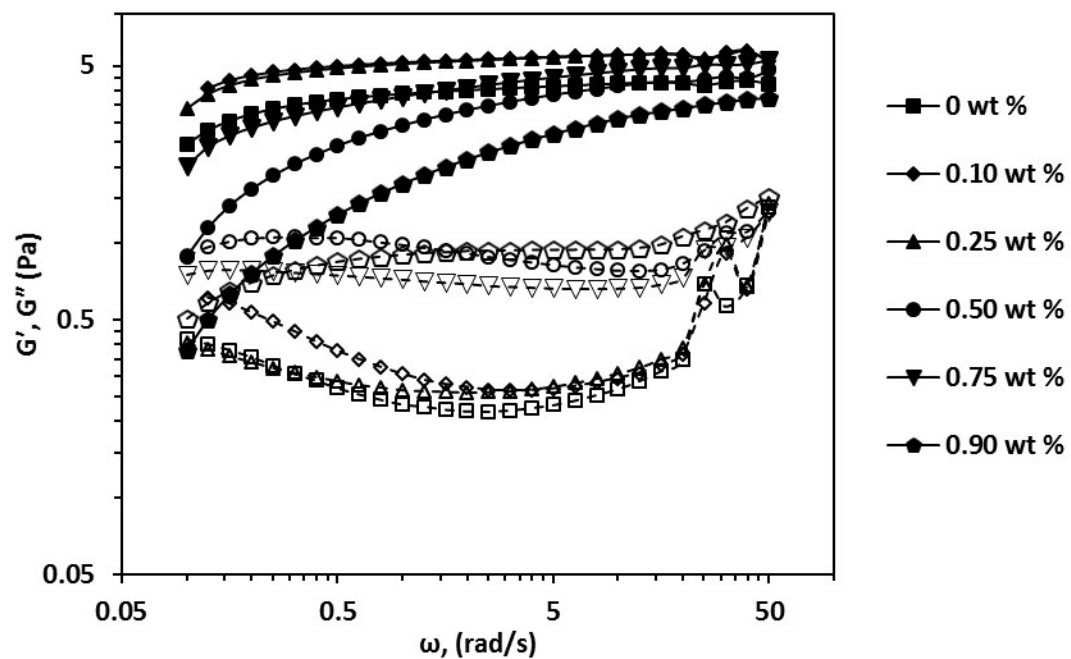

**Figure S 23.** Storage modulus (filled symbols) and loss modulus (open symbols) of 3.96 wt % surfactant solution with different concentrations of crude oil at 60°C

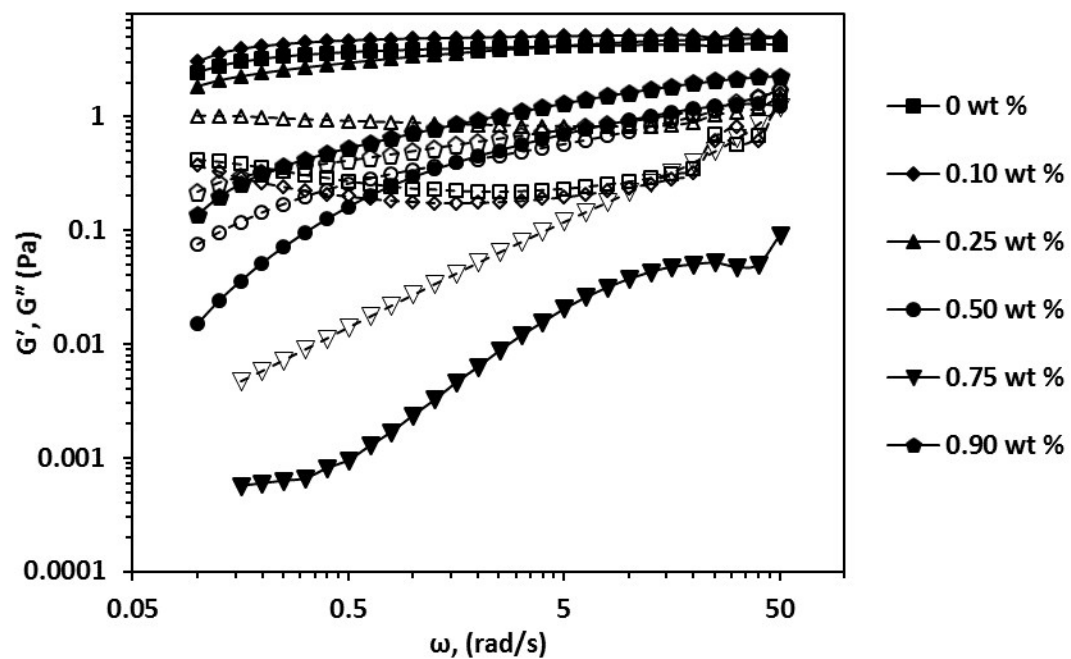

**Figure S 24.** Storage modulus (filled symbols) and loss modulus (open symbols) of 3.96 wt % surfactant solution with different concentrations of EVOO at 60°C

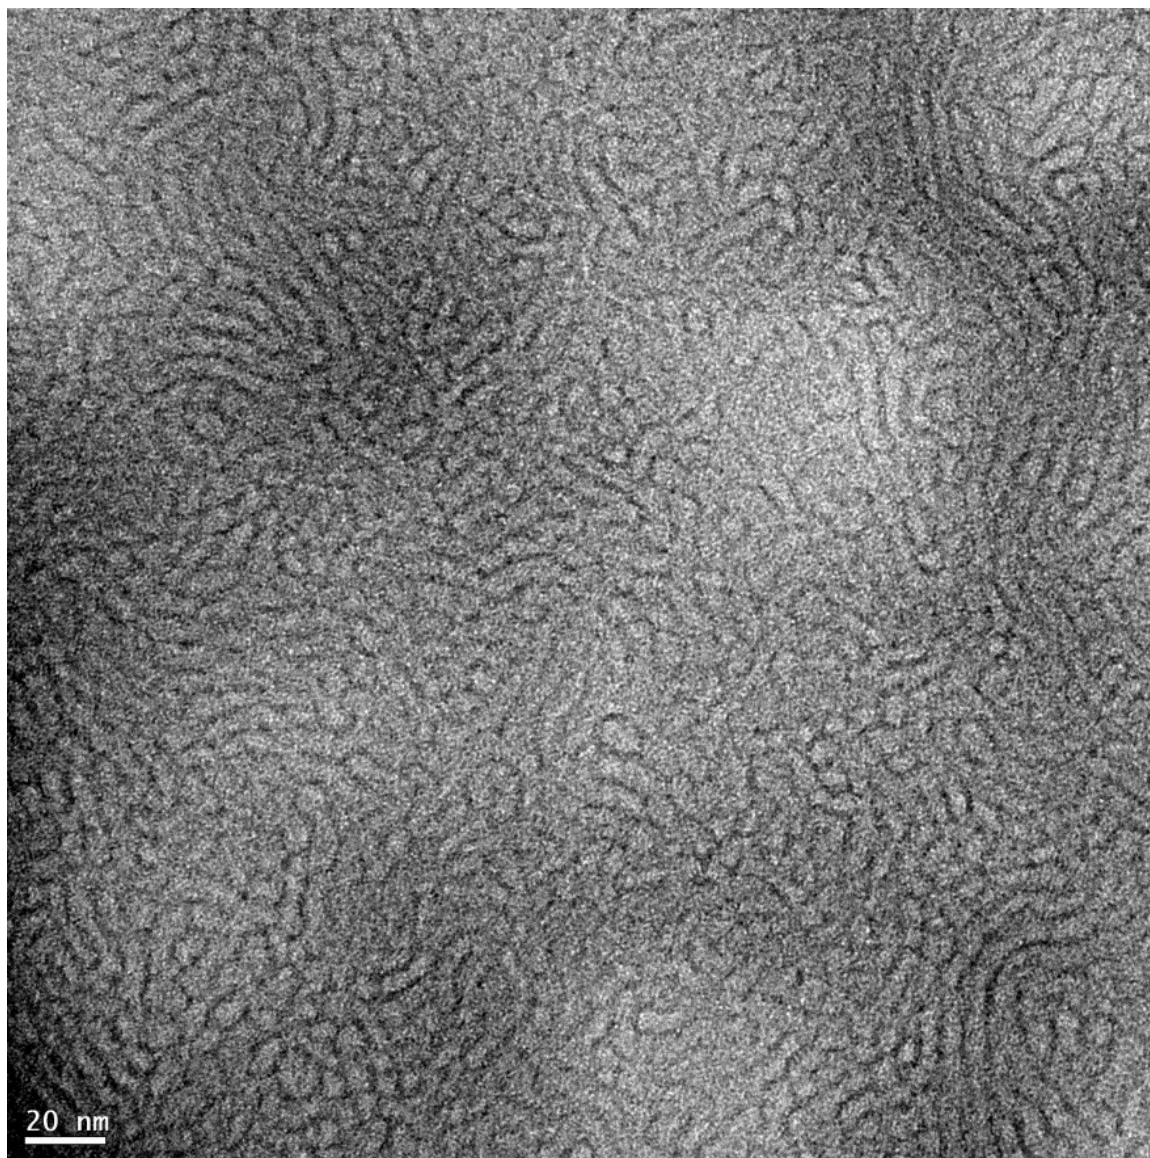

**Figure S 25.** Cryo-TEM image of 3.96 wt % surfactant solution with 3 wt % EVOO at 60°C.

The black lines represent the micelle edges.

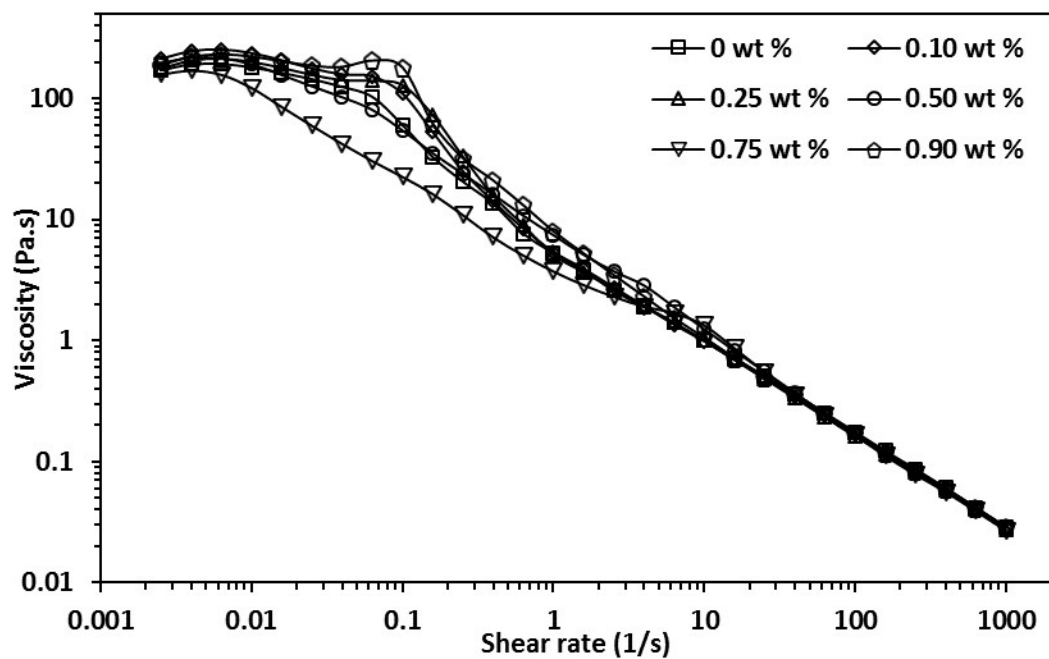

**Figure S 26.** Viscosity vs shear rate of 3.96 wt % surfactant solution with different concentrations of PGA at 30°C

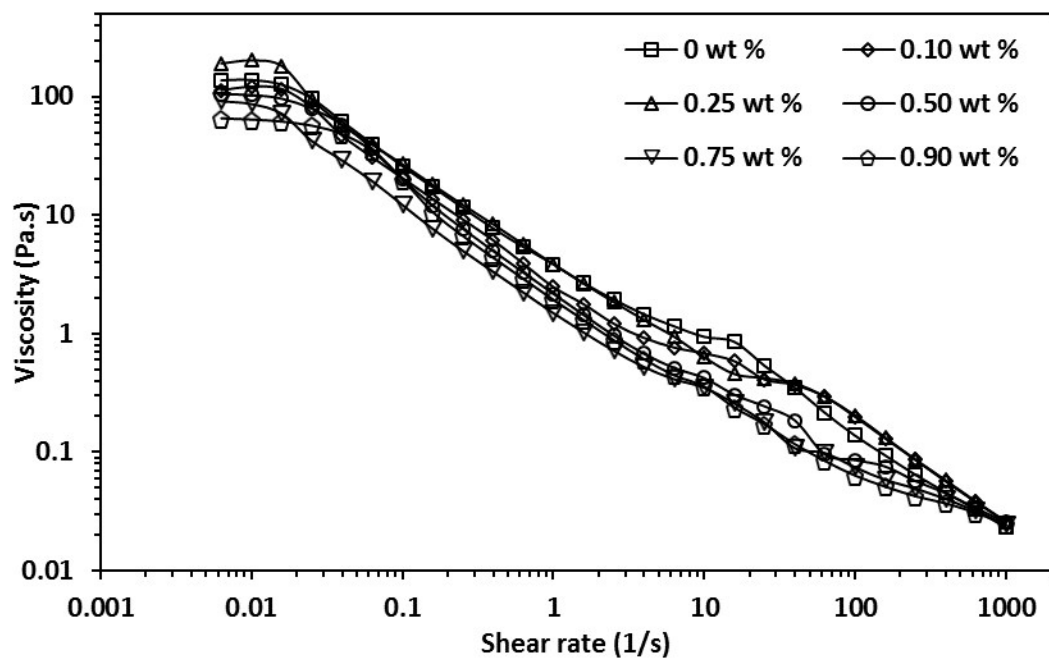

**Figure S 27.** Viscosity vs shear rate of 3.96 wt % surfactant solution with different concentrations of PGA at 60°C

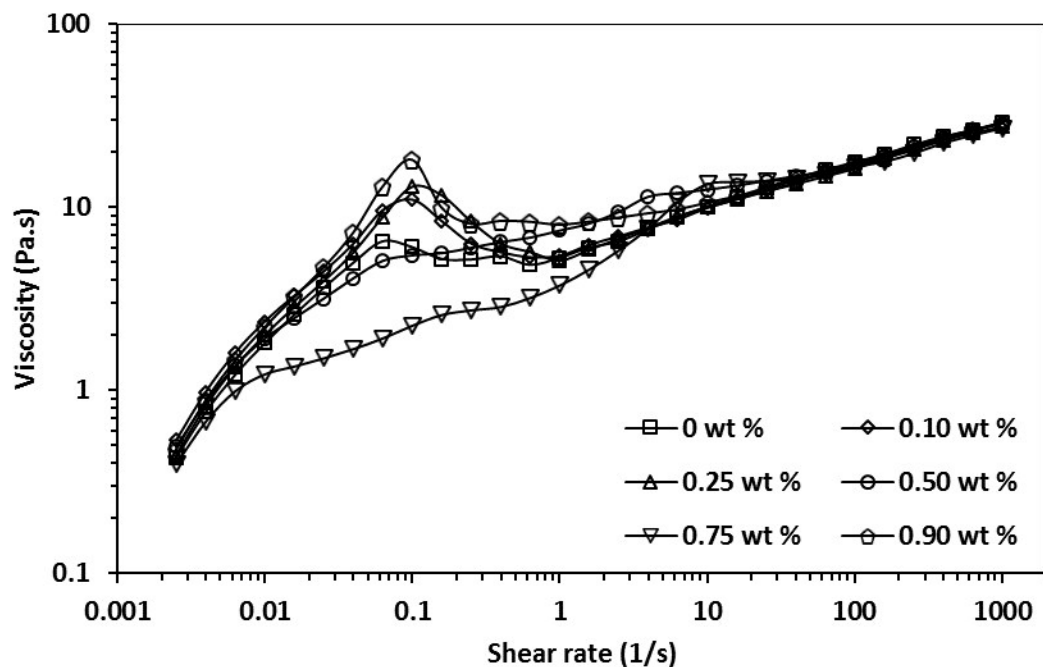

**Figure S 28.** Shear stress vs shear rate of 3.96 wt % surfactant solution with different concentrations of PGA at 30°C

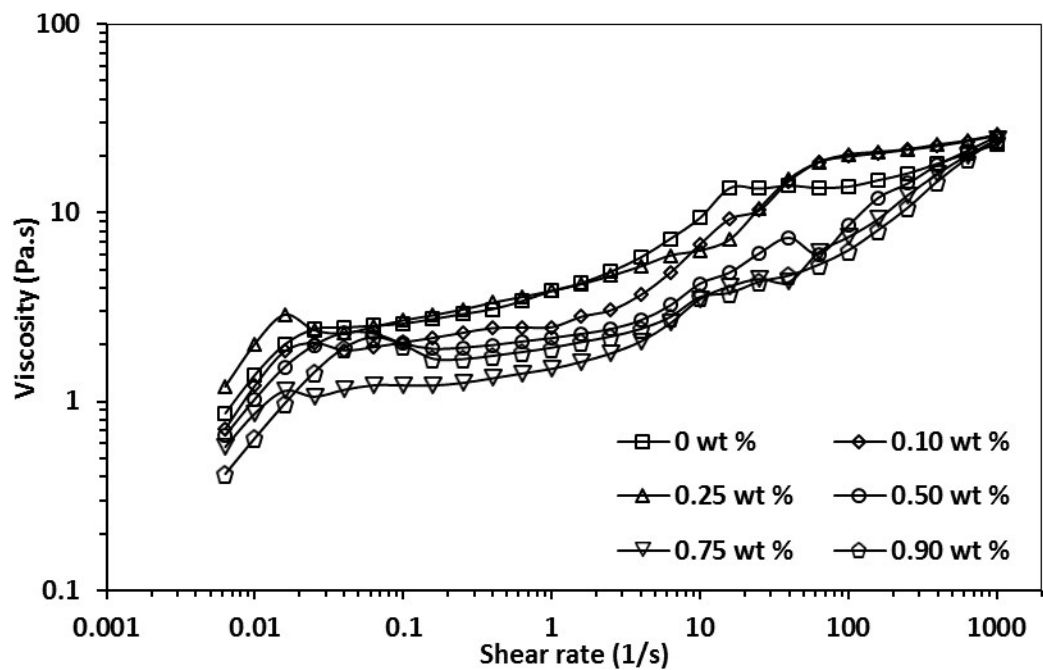

**Figure S 29.** Shear stress vs shear rate of 3.96 wt % surfactant solution with different concentrations of PGA at 60°C

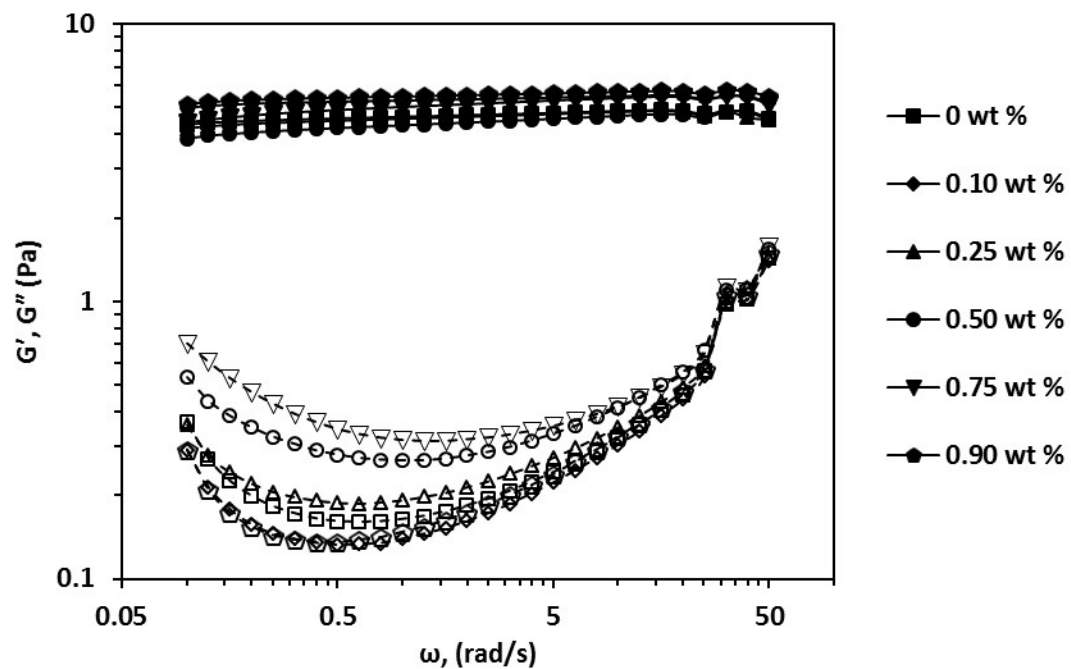

**Figure S 30.** Storage modulus (filled symbols) and loss modulus (open symbols) of 3.96 wt % surfactant with different concentrations of PGA at 30°C

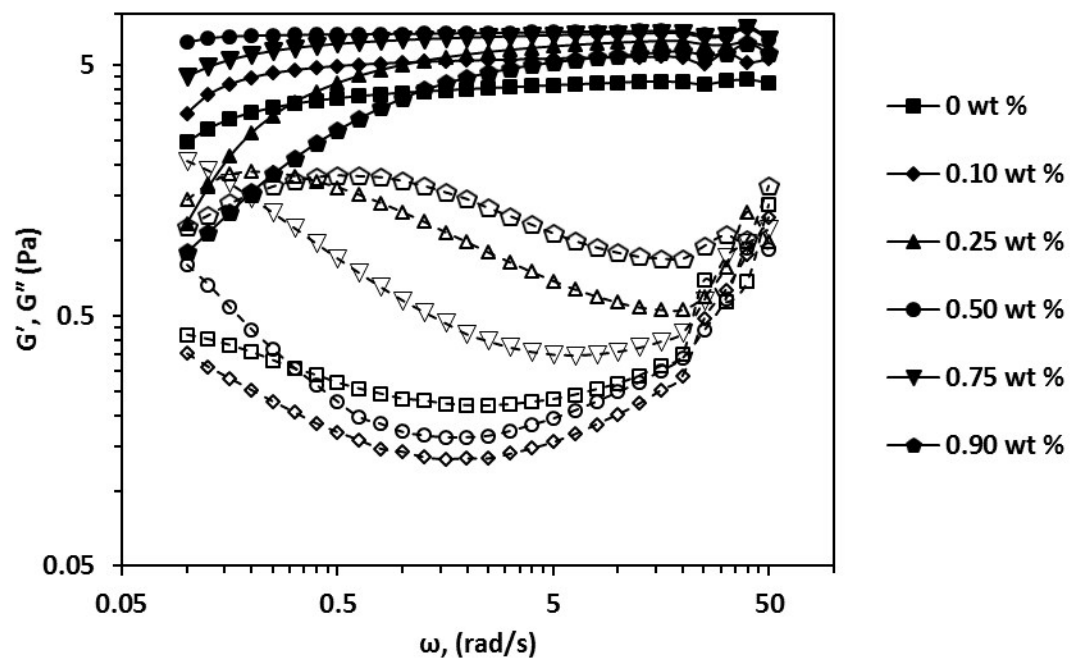

**Figure S 31.** Storage modulus (filled symbols) and loss modulus (open symbols) of 3.96 wt % surfactant with different concentrations of PGA at 60°C
